# Supplementary material for: The Enzymatic and Metabolic Capabilities of Early Life
Source: PubMed Central journal article supplement (PMC3438178; doi:10.1371/journal.pone.0039912), 2012-09-10

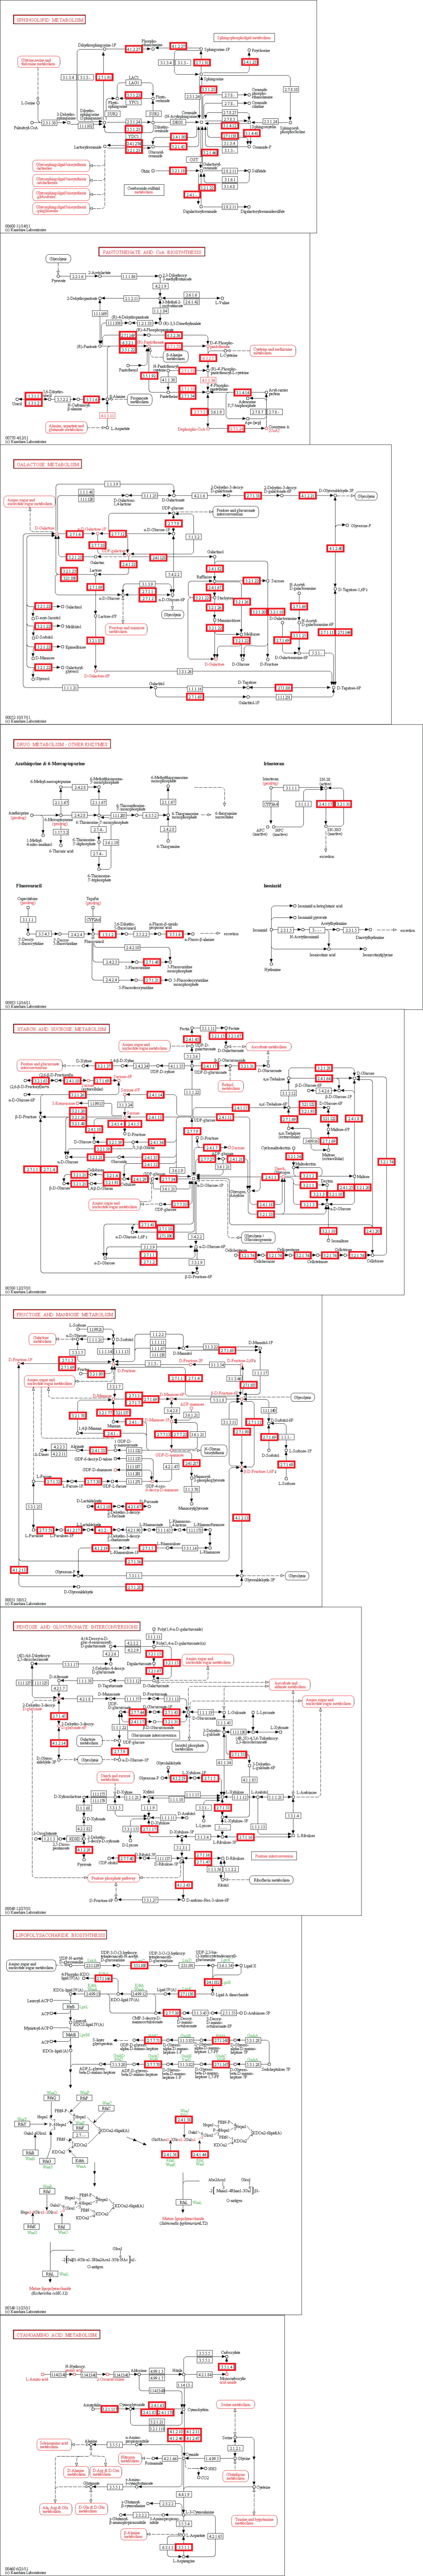

Supplement: pone.0039912.s001.pdf [file pone.0039912.s001.pdf]
